# Supplementary material
Source: publisher site journal article supplement (https://www.dovepress.com/article/175364)
Supplement: Supplementary file 1 [file get_supplementary_file.php]

| Institution Name                                                                                     | Institution Address                                                                        | Institution City State Zip            | Country        |
|------------------------------------------------------------------------------------------------------|--------------------------------------------------------------------------------------------|---------------------------------------|----------------|
| COMITE DE ETICA CAICI-CIAP                                                                           | RODRIGUEZ 1198                                                                             | ROSARIO, SANTA FE, S2000QJI           | Argentina      |
| Comite de Etica Fundacion Ruscullada                                                                 | Av. Velez Sarfield 562 Colón 479                                                           | Cordoba, Córdoba, 5000                | Argentina      |
| COMITE DE ETICA E INVESTIGACION-FUNDACION PARA EL ESTUDIO Y TRATAMIENTO DE LAS ENFERMEDADES MENTALES | CERVINO 4634 5th B                                                                         | BUENOS AIRES, BUENOS AIRES, C1425AHQ  | Argentina      |
| COMITE DE ETICA E INVESTIGACION-SANATORIO PROF LEON S MORRA SA                                       | AV SAGRADA FAMILIA INTERSECCION NAZARET                                                    | CORDOBA, CORDOBA                      | Argentina      |
| COMITE DE ETICA INSTITUCIONAL PARA LA REVISION DE ENSAYOS CLINICOS-IPEM                              | AZCUENAGA 1222 1st FLOOR                                                                   | BUENOS AIRES, BUENOS AIRES, C1115 AAJ | Argentina      |
| HUMAN RESEARCH ETHICS COMMITTEE (TOEH/LMH/MH)                                                        | 28 Woodville Road                                                                          | Adelaide, South Australia, 5011       | Australia      |
| Alfred Human Research & Ethics Committee                                                             | Alfred Hospital Level 1 South Block Commercial Road                                        | Melbourne, VIC, 3004                  | Australia      |
| Ethikkommission der Medizinischen Universität Innsbruck Geschäftsstelle der Ethikkommission          | Innrain 43 Ethikkommission der Medizinischen Universität Innsbruck; Geschäftsstelle der EK | Innsbruck, 6020                       | Austria        |
| Commissie Medische Ethiek van de Universitaire Ziekenhuizen K.U. Leuven                              | Herestraat 49                                                                              | Leuven, 3000                          | Belgium        |
| Toetsingscommissie Ethiek UPC St-Kamillus                                                            | Krijkelberg 1 N/A N/A                                                                      | Bierbeek, VLAAMS-BRABANT, 3360        | Belgium        |
| Commissie voor Medische Ethiek "Spes et Fides"                                                       | Ankerstraat 91                                                                             | Sint-Niklaas, 9100                    | Belgium        |
| Comité d'Ethique Frères de la Charité                                                                | Rue Saint-Hubert 84 Centre Psychiatrique saint-Martin                                      | Dave, Dave, 5100                      | Belgium        |
| Sint-Franciscus Ziekenhuis                                                                           | P. Paquaylaan 129                                                                          | Heusden-Zolder, 3550                  | Belgium        |
| Comité d'ethique CHR La Citadelle                                                                    | Boulevard XII de Ligne 1                                                                   | Liège, 4000                           | Belgium        |
| Comité d'Ethique du CHP – Petit Bourgogne                                                            | Rue Professeur Mahaim 84 N/A N/A                                                           | Liège, LUIK, 4000                     | Belgium        |
| Commissie Medische Ethiek AZ-VUB                                                                     | Laarbeeklaan 101                                                                           | JETTE, 1090                           | Belgium        |
| Comité d'Ethique Clinique psychiatrique des Frères Alexiens                                          | Rue Du Château De Ruyff 68                                                                 | Henri-Chapelle, LUIK, 4841            | Belgium        |
| AZ Sint-Lucas Ethisch Comité                                                                         | Az Sint-Lucas Sint-Lucaslaan 29                                                            | Brugge, 8310                          | Belgium        |
| Comité d'Ethique ISPPC                                                                               | Rue De Gozée 706                                                                           | Montigny-Le-Tilleul, HENEGOUWEN, 6110 | Belgium        |
| Comité d'Ethique du CUP La Clairière                                                                 | Rue Des Ardoisières 100                                                                    | Bertrix, LUXEMBURG, 6880              | Belgium        |
| COMITE DE ETICA EM PESQUISA DA UNIVERSIDADE FEDERAL DE GOIAS COEP/UFG                                | PRIMEIRA AVENIDA, S/N SETOR UNIVERSITARIO                                                  | GOIANIA, GO, 74605-050                | Brazil         |
| COMITE DE ETICA EM PESQUISA DO HOSPITAL UNIVERSITARIO SAO JOSE - FCCMMG                              | ALAMEDA EZEQUIEL DIAS, 275 CENTRO                                                          | BELO HORIZONTE, 30130-110             | Brazil         |
| COMITE DE ETICA EM PESQUISA DA FMUSP/HC                                                              | Rua Dr Ovidio Pires De Campos 225- Cerqueira César                                         | Sao Paulo, 05403-010                  | Brazil         |
| COMITE DE ETICA EM PESQUISA DA MATERNIDADE CLIMERIO DE OLIVEIRA                                      | Rua do Limoeiro, 137 Nazaré                                                                | Salvador                              | Brazil         |
| COMITE DE ETICA EM PESQUISA DO HOSPITAL PRO CARDIACO                                                 | Rua Voluntarios da Pátria, 435 8º andar – Botafogo                                         | Rio de Janeiro                        | Brazil         |
| CONEP - Comissao Nacional de Etica em Pesquisa                                                       | SEPN 510 NORTE BLOCO A 1º SUBSOLO - EDIFÍCIO EXINAN                                        | Brasília                              | Brazil         |
| Ethics Committee for MulticenterTrials                                                               | 5, sq Saint Nedelya Chairman Dr Alexandar Oscar                                            | Sofia, 1000                           | Bulgaria       |
| University of Calgary Heritage Medical Research Clinic                                               | 3280 Hospital Dr. NW Teaching, Research and Wellness Bldg., 5th Floor Research Pharmacy    | Calgary, Alberta, T2N 4Z6             | Canada         |
| McGill University Faculty of Medicine REB                                                            | 3655 Promenade Sir William Osler                                                           | Montreal, H3G1Y6                      | Canada         |
| CDHA Research Ethics Board - CANADA                                                                  | Victoria Building, Room 11-044 1278 Tower Road                                             | Halifax, NS, B3H 1V7                  | Canada         |
| Institutional Review Board Services                                                                  | 372 Hollandview Trail Suite 300 IRB Services                                               | Aurora, ON, L4G 0A5                   | Canada         |
| CHUM Research Ethics Committee                                                                       | CHUM Research Ethics Committee 3981 St-Laurent, Mezz.2 Cooper Building                     | Montreal, Quebec, H2W 1Y5             | Canada         |
| beijing anding hospital                                                                              | ankanghutong xicheng district, beijing                                                     | beijing                               | China          |
| Peking University of Institute of Mental Health                                                      | No 51 Huayuanbei Road                                                                      | Beijing, Beijing, 100191              | China          |
| IEC of Shanghai Mental Health Center                                                                 | No 600 South Wan Ping Road                                                                 | Shanghai, 200030                      | China          |
| Guangzhou Brian Hospital                                                                             | 36 Fangcun Mingxin Road Guangzhou China N/A N/A                                            | Guangzhou, 510370                     | China          |
| The 3rd Affiliated Hospital of Sun Yatsen University                                                 | No.600, Tianhe Road,Guangzhou                                                              | Guangzhou, 510630                     | China          |
| IEC of the first affiliated hospital of Kunming Medical University                                   | No 2 Kunshi Rd Wuhua District                                                              | Kunming, Yunnan, 650032               | China          |
| IEC of Renmin Hospital of Wuhan University                                                           | No 238 Jiefang Road Wuchang District                                                       | Wuhan, Hubei, 430060                  | China          |
| The Institution of Beijing Huilongguan Hospital                                                      | Huilongguan street, Changping District                                                     | Beijing, 102200                       | China          |
| IEC of The Second People's Hospital, Hunan Province                                                  | No 427 The Third Block Middle Furong Road                                                  | Changsha, Hunan, 410007               | China          |
| IEC of Xi'an Mental Health center                                                                    | 15 Yanyin Road Qujiang New District                                                        | Xian, Shaanxi, 710061                 | China          |
| IEC of The First Affiliated of Fourth Military Medical University                                    | No 127 Changlexi Road                                                                      | Xian, Shaanxi, 710032                 | China          |
| Tianjin Anding Hospital                                                                              | No.39, Wujia Yao Road, Hexi District, Tianjin                                              | Tianjin                               | China          |
| Second Affiliated Hospital of Zhejiang Unvierstiy of Medicine                                        | No 88 Jiefang Road                                                                         | Hangzhou, Zhejiang Province, 310009   | China          |
| Nanjing Brain Hospital-IRB                                                                           | No. 264, Guangzhou Road                                                                    | Nanjing, 210029                       | China          |
| The Institution of The mental health center of Hebei Province                                        | No.572 East Dongfeng Road                                                                  | Baoding, Hebei, 071000                | China          |
| Guangdong General Hospital                                                                           | 106 Zhongshan Er Road Guangzhou China NA NA                                                | Guangzhou, 510080                     | China          |
| Eticka komise Nemocnice Horovice                                                                     | K Nemocnici 1106 NH Hospital a.s.                                                          | Horovice, 268 31                      | Czech Republic |
| Eticka komise pro multicentricka klinicka hodnoceni, Fakultni nemocnice v Motole                     | Eticka komise pro multicentricka klinicka hodnoceni Fakultni nemocnice v Motole V uvalu 84 | Praha 5, 150 06                       | Czech Republic |
| Eticka komise Fakultni nemocnice Brno                                                                | Eticka komise Fakultni nemocnice Brno Jihlavska 20                                         | BRNO, N/A, 625 00                     | Czech Republic |
| Eticka komise Nemocnice Jihlava                                                                      | Vrchlickeho 59                                                                             | Jihlava, 58633                        | Czech Republic |
| Eticka komise pri Krajske nemocnici Liberec, a.s.                                                    | Husova 10                                                                                  | Liberec, Liberec, 46063               | Czech Republic |
| Eticka komise Okresni nemocnice Tabor                                                                | Kpt. Jarose 2000                                                                           | Tabor, 390 03                         | Czech Republic |
| Eticka komise CLINTRIAL, s.r.o.                                                                      | POCERNICKA 16                                                                              | PRAHA 10, 100 00                      | Czech Republic |
| Etická komise FN Motol                                                                               | V Uvalu 85 N/A N/A                                                                         | Praha 5 N/a, 150 06                   | Czech Republic |
| ETHIKKOMMISSION BEI DER LANDESÄRZTEKAMMER BADEN-WÜRTTEMBERG                                          | JAHNSTRASSE 40                                                                             | STUTTGART, 70597                      | Germany        |
| Ethik-Kommission der Landesärztekammer in Hessen                                                     | Im Vogelgesang 3                                                                           | Frankfurt am Main, 60488              | Germany        |
| ETHIK-KOMMISSION DER ÄRZTEKAMMER NORDRHEIN                                                           | Tersteegenstr 9                                                                            | Düsseldorf, 40474                     | Germany        |
| Ethikkommission der Aerztekammer Hamburg                                                             | Weidestr. 122b                                                                             | HAMBURG, 22083                        | Germany        |
| ETHIKKOMMISSION DER ÄRZTEKAMMER WESTFALEN-LIPPE UND DER MED. FAKULTÄT DER WWU-MÜNSTER                | Gartenstr. 210-214                                                                         | MUENSTER, 48147                       | Germany        |
| Ethikkommission I der Medizinischen Fakultät Heidelberg der Ruprecht-Karls-Universität               | Alte Glockengiesserei 11/1                                                                 | Heidelberg, 69115                     | Germany        |
| ETHIK-KOMMISSION DER MEDIZINISCHEN FAKULTÄT DER MARTIN-LUTHER-UNIVERSITÄT HALLE-WITTENBERG           | Magdeburger Straße 8                                                                       | Halle, 06112                          | Germany        |
| Ethikkommission der Fakultät für Medizin der TU                                                      | Ismaninger Str. 22                                                                         | MÜNCHEN, BAYERN, 81675                | Germany        |
| National Ethics Committee                                                                            | 284, Mesogion Avenue Holargos                                                              | Athens, 15562                         | Greece         |
| MEDICAL RESEARCH COUNCIL ETHICS COMMITTEE FOR CLINICAL PHARMACOLOGY                                  | Arany János Utca 6-8                                                                       | Budapest, 1051                        | Hungary        |
| Kamitsuga General Hospital IRB                                                                       | 1-1033 Shimota-machi, Kanuma-City, Tochigi                                                 | Kanuma, 322-0036                      | Japan          |
| Seiwakai Shoda Hospital IRB                                                                          | 1-16-32 Annaka, Annaka-City, Gunma                                                         | Annaka, 379-0116                      | Japan          |

|                                                                                               |                                                                                                       |                                   |            |
|-----------------------------------------------------------------------------------------------|-------------------------------------------------------------------------------------------------------|-----------------------------------|------------|
| Maebashi Hirosegawa Clinic IRB                                                                | 2-10-9 Chiyoda-cho, Maebashi-City, Gunma                                                              | Maebashi, 371-0022                | Japan      |
| Shinozuka Hospital IRB                                                                        | 105-1 Shinozuka, Fujioka-City, Gunma                                                                  | Fujioka, 375-0017                 | Japan      |
| Kohnodai Hospital IRB, National Center for Global Health and Medicine                         | 1-7-1 Kohnodai, Ichikawa-City, Chiba                                                                  | Ichikawa, 272-8516                | Japan      |
| Sakayori Clinic IRB                                                                           | 2-26-3 Higashi-Oi, Shinagawa-ku, Tokyo                                                                | Tokyo, 140-0011                   | Japan      |
| National Center of Neurology and Psychiatry IRB                                               | 4-1-1 Ogawa Higashi-Cho, Kodaira-City, Tokyo                                                          | Kodaira, 187-8551                 | Japan      |
| Asai Dermatology Clinic IRB                                                                   | 1-14 Katabiracho, Hodogaya-ku, Yokohama-City, Kanagawa                                                | Yokohama, 240-0013                | Japan      |
| Yamanashi Prefectural Kita Hospital IRB                                                       | 3314-13, Kamijominamiwari, Asahi-machi, Nirasaki-City, Yamanashi                                      | Nirasaki, 407-0046                | Japan      |
| Japanese Red Cross Society Azumino Hospital IRB                                               | 5685 Toyoshina, Azumino-City, Nagano                                                                  | Azumino                           | Japan      |
| Aichi Medical Association IRB                                                                 | 4-14-28 Sakae, Naka-ku, Nagoya-City, Aichi                                                            | Nagoya, 460-0008                  | Japan      |
| Fujita Health University Hospital IRB                                                         | 1-98 Dengakugakubo Kutsukake-cho, Toyoake-City, Aichi                                                 | Toyoake, 470-1192                 | Japan      |
| Hinaga general center for mental care IRB                                                     | 5039 Hinaga, Yokkaichi-City, Mie                                                                      | Yokkaichi, 510-8575               | Japan      |
| Osaka Medical College Hospital IRB                                                            | 2-7 Daigaku-Machi, Takatsuki-City, Osaka                                                              | Takatsuki, 569-8686               | Japan      |
| Kansai Medical University Takii Hospital IRB                                                  | 10-15 Fumizono-Cho, Moriguchi-City, Osaka                                                             | Moriguchi, 570-8507               | Japan      |
| Nakameguro Atlas Clinic IRB                                                                   | 1-26-1 Kamimeguro, Meguro-ku, Tokyo                                                                   | Tokyo, 153-0051                   | Japan      |
| Nara Medical University Hospital IRB                                                          | 840 Shijyo-cho, Kashihara-City, Nara                                                                  | Kashihara, 634-8522               | Japan      |
| Hayakawa Clinic IRB                                                                           | 2-7-4 Hiro-obiro, Kure-City, Hiroshima                                                                | Kure, 737-0111                    | Japan      |
| Yamaguchi Grand Medical Center IRB                                                            | 77 Ozaosaki, Hohfu-City, Yamaguchi                                                                    | Hohfu, 747-8511                   | Japan      |
| Tokushima University Hospital IRB                                                             | 2-50-1 Kuramoto-cho, Tokushima-City, Tokushima                                                        | Tokushima, 770-8503               | Japan      |
| Hosogi Unity Hospital IRB                                                                     | 100 Nishi-Machi, Kochi-City, Kochi                                                                    | Kochi, 780-8535                   | Japan      |
| National Hospital Organization Hizen Psychiatric Center IRB                                   | 160 Mitsu,Yoshinogari-cho, Kanzaki-gun, Saga                                                          | Kanzaki, 842-0192                 | Japan      |
| Kouseikai Hospital IRB                                                                        | 1-3-12 Hayama, Nagasaki-City, Nagasaki                                                                | Nagasaki, 852-8053                | Japan      |
| Yuge Hospital IRB                                                                             | 679-2 Yuge Tatsuta-Machi, Kita-ku, Kumamoto-City, Kumamoto                                            | Kumamoto, 861-8002                | Japan      |
| Arakaki Hospital IRB                                                                          | 4-10-3 Ageda, Okinawa-City, Okinawa                                                                   | Okinawa, 904-0012                 | Japan      |
| Asakayama General Hospital IRB                                                                | 3-3-16 Imai-cho, Sakai-ku, Sakai-City, Osaka                                                          | Sakai, 590-0018                   | Japan      |
| Aoki Hospital IRB                                                                             | 1-13-27 Shimonodou, Honjo-City, Saitama                                                               | Honjo, 367-0063                   | Japan      |
| Yaesu Sakuradori Clinic IRB                                                                   | 1-6-6 Yaesu, Chuo-ku, Tokyo                                                                           | Tokyo, 103-0028                   | Japan      |
| Tokyo Metropolitan Matsuzawa Hospital IRB                                                     | 2-1-1 Kamikitazawa, Setagaya-ku, Tokyo                                                                | Tokyo, 156-0057                   | Japan      |
| Osaka Institute of Clinical Psychiatry Shin-abuyama Hospital IRB                              | 4-10-1 Nasahara, Takatsuki-City, Osaka                                                                | Takatsuki, 569-1041               | Japan      |
| Mie University Hospital IRB                                                                   | 2-174 Edobashi, Tsu-City, Mie                                                                         | Tsu, 514-8507                     | Japan      |
| Tokushukai Group IRB                                                                          | 1-8-7 Kojimachi, Chiyoda-ku, Tokyo                                                                    | Tokyo, 102-0083                   | Japan      |
| Takaoka Hospital IRB                                                                          | 5-3-8 Nishi-Imajyuku, Himeji-City, Hyogo                                                              | Himeji, 670-0061                  | Japan      |
| Chonnam National University Hospital IRB                                                      | 42 Jebongro, Dong-gu                                                                                  | Gwangju-si, 61469                 | Korea      |
| Korea University Ansan Hospital IRB                                                           | Korea University Ansan Hospital 123 Jeokgeum-ro, Danwon-gu                                            | Ansan, Gyeonggi-do, 425-707       | Korea      |
| Busan Paik Hospital Inje University IRB                                                       | 633-165 GaeGeum-dong, Busanjin-gu                                                                     | Busan, 614-735                    | Korea      |
| Comité National d'Ethique de Recherche                                                        | 1A-1B Rue Thomas Edison                                                                               | Strassen, 1445                    | Luxembourg |
| Comite de Etica del Instituto Vida Nueva de Monterrey A.C.                                    | Rayon 404 Sur                                                                                         | Monterrey, Nuevo Leon, 64000      | Mexico     |
| Comite de Etica en Investigacion Accelerium Clinical Research                                 | Modesto Arreola No. 917 Ote Col. Centro                                                               | Monterrey, Nuevo Leon, 64000      | Mexico     |
| Comisiones de Etica y de Investigación de la Escuela de Medicina del Tecnológico de Monterrey | Av. Morones Prieto 3000 Pte. Col. Los Doctores Edificio CITES 3er Piso Lado Poniente                  | Monterrey, Nuevo Leon, 64710      | Mexico     |
| Comité de Etica en Investigación de Grupo Medico Carracci                                     | Carracci 107 Col. Insurgentes Extremadura                                                             | Mexico, Distrito Federal, 03740   | Mexico     |
| Comités de Etica e Investigación para el Fortalecimiento de Capacidades en Salud              | Convento San Juan De Los Lagos No 97 Col. Jardines de Santa Mónica                                    | Tlalnepantla, MEX, 54050          | Mexico     |
| Centro Hospitalario Vicor SA de CV, CHG Hospitales                                            | Nebulosa 2956 Jardines del bosque                                                                     | Guadalajara, Jalisco, 44520       | Mexico     |
| COMITE DE ETICA E INVESTIGACION DEL HOSPITAL MEXICO AMERICANO SC                              | COLOMOS 2110 COL. LADRON DE GUEVARA                                                                   | GUADALAJARA, 44620                | Mexico     |
| Comissão de Etica para a Investigação Científica                                              | Parque De Saude De Lisboa AVENIDA DO BRASIL 53 PAV. 17 - A                                            | Lisboa, 1749004                   | Portugal   |
| Comisia Nationala de Bioetica a Medicamentului si a Dispozitivelor Medicale                   | Sos Stefan cel Mare nr.19-21 Sector 2 Dispozitivelor Medicale                                         | Bucharest                         | Romania    |
| Ethics Committee of Research institute of mental health                                       | Aleutskaya str. 4                                                                                     | Tomsk, 630414                     | Russia     |
| Independent Interdisciplinary Committee for Ethics Expertise of Clinical Trials               | 51 Leningradsky prospect                                                                              | Moscow, 125468                    | Russia     |
| Independent Ethics Committee of Bekhterev Psychoneurological Research Institute               | 3 Bekhterev Str                                                                                       | Sain-Petersburg, 192019           | Russia     |
| Ethics Committee of Kashenko Psychiatric hospital #1                                          | Nikolskoye                                                                                            | Gatchina, 188357                  | Russia     |
| Smolensk state medical academy of Federal agency of healthcare                                | 28, ul.Krupskoj                                                                                       | Smolensk, 214019                  | Russia     |
| Eticka komisija Bratislavského samosprávneho kraja                                            | Sabinovska 16                                                                                         | Bratislava, 820 05                | Slovakia   |
| Eticka komisija Trencianskeho samosprávneho kraja                                             | K dolnej stanici 7282/20A                                                                             | Trencin, 91101                    | Slovakia   |
| Eticka komisija Psychiatrickej nemocnice Michalovce, n.o.                                     | Eticka Komisia Psychiatrickej Nemocnice Michalovce Stranany                                           | Michalovce, 07101                 | Slovakia   |
| Nezávislá etická komisija Banskobystrického samosprávneho kraja                               | Nezávislá etická komisija Banskobystrického kraja Namestie SNP 23                                     | Banska Bystrica, 974 01           | Slovakia   |
| CEIC Área de Salud de Zamora                                                                  | Hospital Virgen de la Concha.Avda. Hernán Cortés, 40                                                  | Zamora, 49021                     | Spain      |
| CEIC Parc de Salut Mar                                                                        | Calle Doctor Aiguader 88 Edifici 88 PRBB                                                              | Barcelona, BARCELONA, 08003       | Spain      |
| CEIC HU DE BELLVITGE - SECRETARÍA ADMINISTRATIVA - UNITAT DE SUPORT A LA RECERCA              | Feixa Larga S/n L'hospitalet De Llobregat                                                             | Barcelona, 08907                  | Spain      |
| HOSPITAL LA PRINCESA - COMITÉ ETICO DE INVESTIGACION CLINICA                                  | DIEGO DE LEON 62                                                                                      | MADRID, 28006                     | Spain      |
| CEIC HOSPITAL GENERAL UNIVERSITARIO DE ELCHE                                                  | Calle Cami Almazara 11 (3ª Planta edificio anexo al Hospital)                                         | Alicante, 03203                   | Spain      |
| CEIC Hospital de Cruces Pabelon Investigación (detras del P de Administracion)                | (epidemiología Clínica) - Plaza De Cruces 12 SECRETARIA DEL COMITÉ ÉTICO DE INVESTIGACIÓN CLÍNICA     | Barakaldo, 48903                  | Spain      |
| HOSPITAL DE DONOSTIA - SECRETARIA CEIC                                                        | Pº Dr Beguiristain S/n CEIC del Area Sanitaria de Guipuzcoa                                           | San Sebastian, 20014              | Spain      |
| COMITE AUTONOMICO DE ENSAYOS CLINICOS DE ANDALUCIA                                            | Avda De La Innovacion S/n Edificio Arena 1 CONSEJERIA DE SALUD - SECRETARIA GENERAL DE CALIDAD Y      | Sevilla, 41071                    | Spain      |
| CEIC H CLINICO SAN CARLOS                                                                     | Hospital Clinico San Carlos SERVICIO DE FARMACOLOGIA CLINICA 1ª PLANTA NORTE C/ Profesor Martín Lagos | Madrid, 28040                     | Spain      |
| CEIC HOSPITAL UNIVERSITARIO SAN JUAN DE ALICANTE                                              | Horta San Juan De Alicante Servicio de Psiquiatria. 3ª planta norte Ctra. Alicante-Valencia s/n       | San Juan, 03550                   | Spain      |
| CEIC Hospital de Torreveija                                                                   | Carretera de Torreveija a San Miguel de Salinas CV-95, Partida La Ceñuela s/n Servicio de Psiquiatria | Torreveija, Alicante, 03186       | Spain      |
| Bali Psychiatric Center                                                                       | No. 33, Huafushan                                                                                     | Bali Township, Taipei County, 249 | Taiwan     |
| Taoyuan Psychiatric Center IEC                                                                | No. 71, Long-Shou Street Taoyuan District                                                             | Taoyuan City, 33058               | Taiwan     |
| Chang Gung Medical Foundation Institutional Review Board                                      | B2, No.123, Dinghu Rd Guishan Township 333                                                            | Taoyuan County, 333               | Taiwan     |
| Central Ethics Commission of MoH of Ukraine                                                   | 5 Narodno Opolchennya Str N/A N/A                                                                     | Msp Kiev, 03680                   | Ukraine    |
| Ethics Commission of Kyiv City Clinical Psychoneurology Hospital                              | 103A Frunze Str NA NA                                                                                 | Kiev, 04080                       | Ukraine    |

|                                                                                                 |                                                            |                              |         |
|-------------------------------------------------------------------------------------------------|------------------------------------------------------------|------------------------------|---------|
| Ethics Commission of Kyiv City Psychoneurology Hospital # 2                                     | 8 Miropilska Str                                           | Kiev, 02660                  | Ukraine |
| Ethics Commission of the Institute of Neurology, Psychiatry and Narcology of the NAS of Ukraine | 46, Acad. Pavlova Str N/A N/A                              | Kharkiv, 61068               | Ukraine |
| Ethics comission of Poltava regional clinical psychiatry hospital named after O.F. Maltsev      | 1 Medychna Str N/A N/A                                     | Poltava, 36013               | Ukraine |
| Ethics Commission of the Crimean Republican Institution "Clinical Psychiatry Hospital #1"       | 27 R Luxemburg St N/A N/A                                  | Simferopol, 95006            | Ukraine |
| Ethics Commission at Odessa Regional Psychoneurological Dispensary                              | 27, Kanatna Str N/A N/A                                    | Odessa, 65014                | Ukraine |
| Bioethics Commission of Donetsk Regional Clinical Psychiatry Hospital                           | 19, Odintsova Str N/A N/A                                  | Donetsk, 83008               | Ukraine |
| Ethics Commission of Municipal Institution Kherson Regional Psychiatric Hospital                | 65 G Hovard Street N/A N/A                                 | Kherson, 73488               | Ukraine |
| Sterling Institutional Review Board                                                             | 6300 Powers Ferry Road Suite 600-351                       | Atlanta, GA, 30339           | USA     |
| Sharp HealthCare Institutional Review Board                                                     | 7930 Frost Street, Suite 300 Sharp Community Medical Group | San Diego, CA, 92123         | USA     |
| Louisiana State University                                                                      | 1501 Kings Highway Rm 6-326                                | Shreveport, Louisiana, 71103 | USA     |
